# Supplementary material
Source: bioRxiv or medRxiv preprint supplement (https://www.biorxiv.org/highwire/filestream/6591/field_highwire_adjunct_files/17/024869-8.pdf)

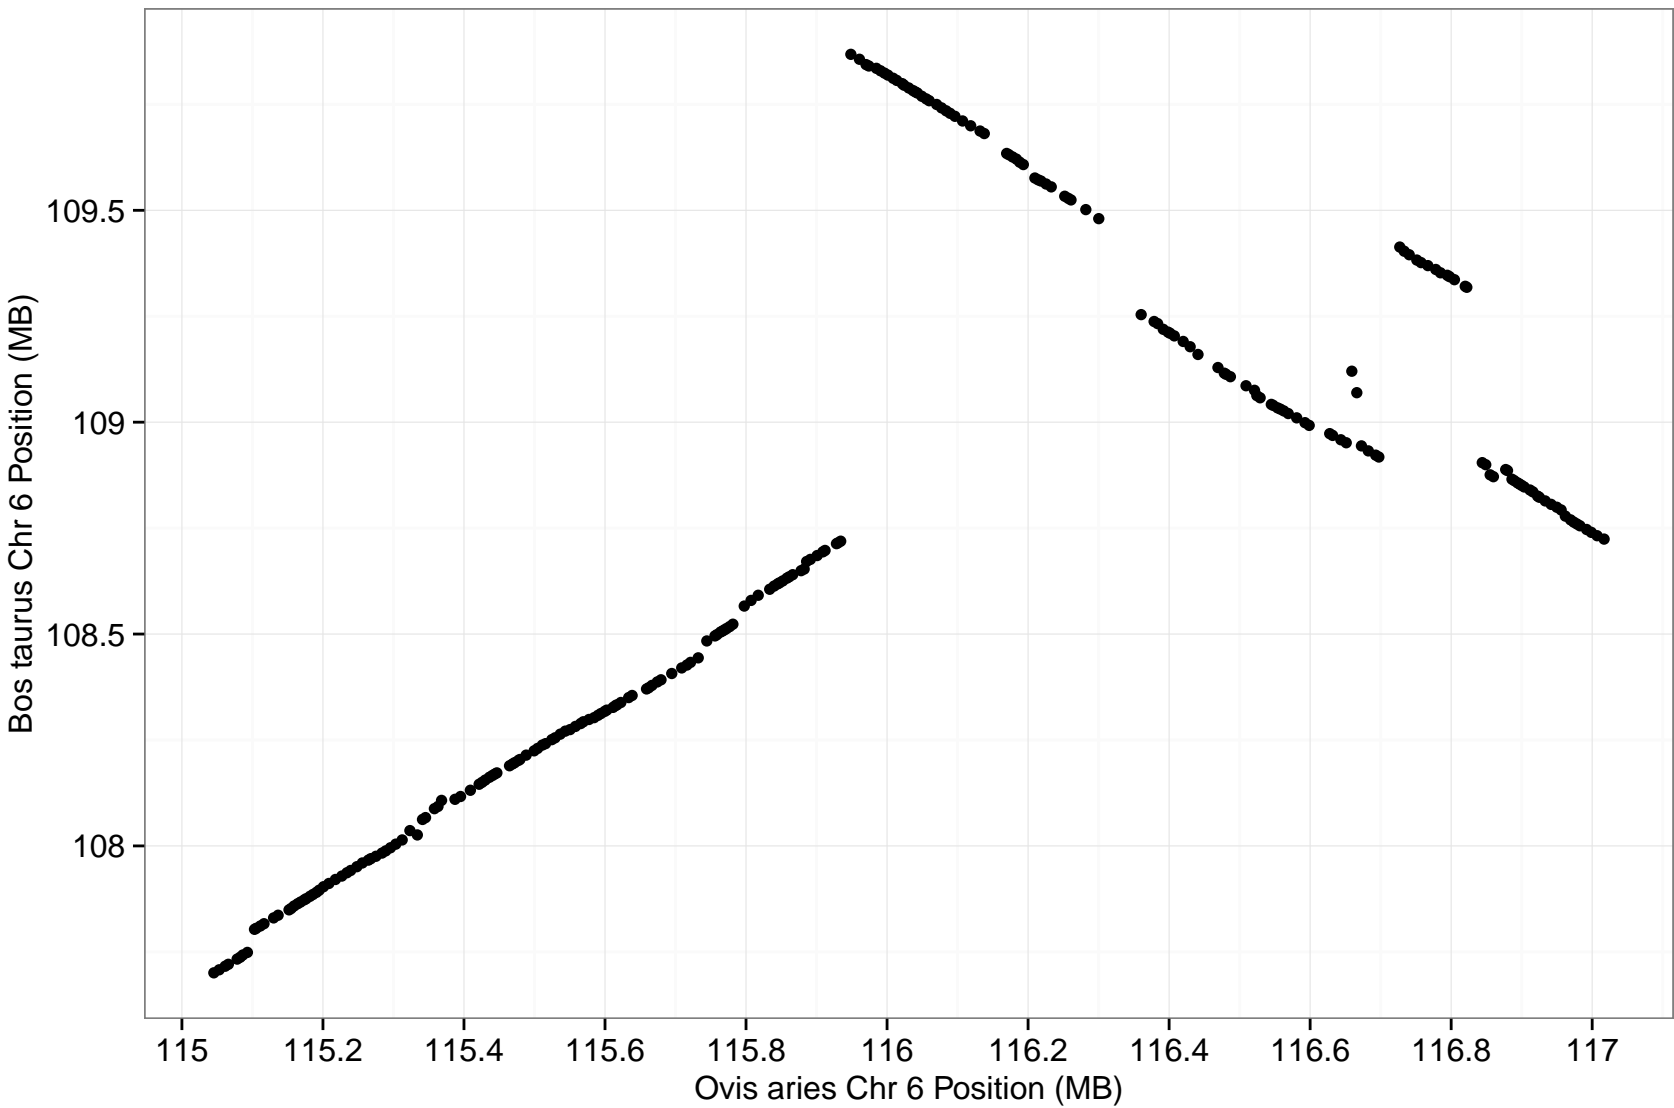

Supplement: Supplementary file [file 024869-8.pdf]
